# Supplementary material for: The Vulvar Immunohistochemical Panel (VIP) Project: Molecular Profiles of Vulvar Squamous Cell Carcinoma
Source: MDPI journal article supplement (doi:10.3390/cancers13246373), 2021-12-19
Supplement: s1 [file s1]

Supplementary Materials

# The Vulvar Immunohistochemical Panel (VIP) Project: Molecular Profiles of Vulvar Squamous Cell Carcinoma

Giorgia Garganese , Frediano Inzani, Simona Maria Fragomeni, Giulia Mantovani, Luigi Della Corte , Alessia Piermattei, Angela Santoro, Giuseppe Angelico, Luciano Giacò, Giacomo Corrado, Anna Fagotti, Gian Franco Zannoni and Giovanni Scambia

**Table S1.** Antibodies used for immunohistochemical reactions.

| Antibody  | Clone                    | Antibody Supplier            | Detection                                | Instrument                                                      |
|-----------|--------------------------|------------------------------|------------------------------------------|-----------------------------------------------------------------|
| anti-ER   | SP1                      | Roche/Ventana,<br>Tucson, AZ | UltraView Universal DAB<br>Detection Kit | BenchMark ULTRA<br>(Roche/Ventana)                              |
| anti-PR   | 1E2                      |                              |                                          |                                                                 |
| anti-HER2 | 4B5                      |                              |                                          |                                                                 |
| anti-p53  | Bp53-11                  |                              |                                          |                                                                 |
| anti-CD3  | 2GV6                     |                              |                                          |                                                                 |
| anti-p16  | CINtec®<br>Histology Kit |                              | OptiView DAB IHC Detection<br>Kit        |                                                                 |
| PD-L1     | SP263                    |                              |                                          |                                                                 |
| anti-MLH1 | M1                       |                              |                                          |                                                                 |
| anti-MSH2 | G219-1129                |                              |                                          |                                                                 |
| anti-MSH6 | SP93                     |                              |                                          |                                                                 |
| anti-PMS2 | A16-4                    |                              |                                          |                                                                 |
| anti-CD31 | JC70A                    | LEICA                        | BOND™ Polymer Refine<br>Detection System | Bond III automated<br>immunostainer<br>(Leica Microsystems, IL) |
| anti-VEGF | VG1                      | DAKO/AGILENT                 |                                          |                                                                 |
| anti-EGFR | E30                      | DAKO/AGILENT                 |                                          |                                                                 |

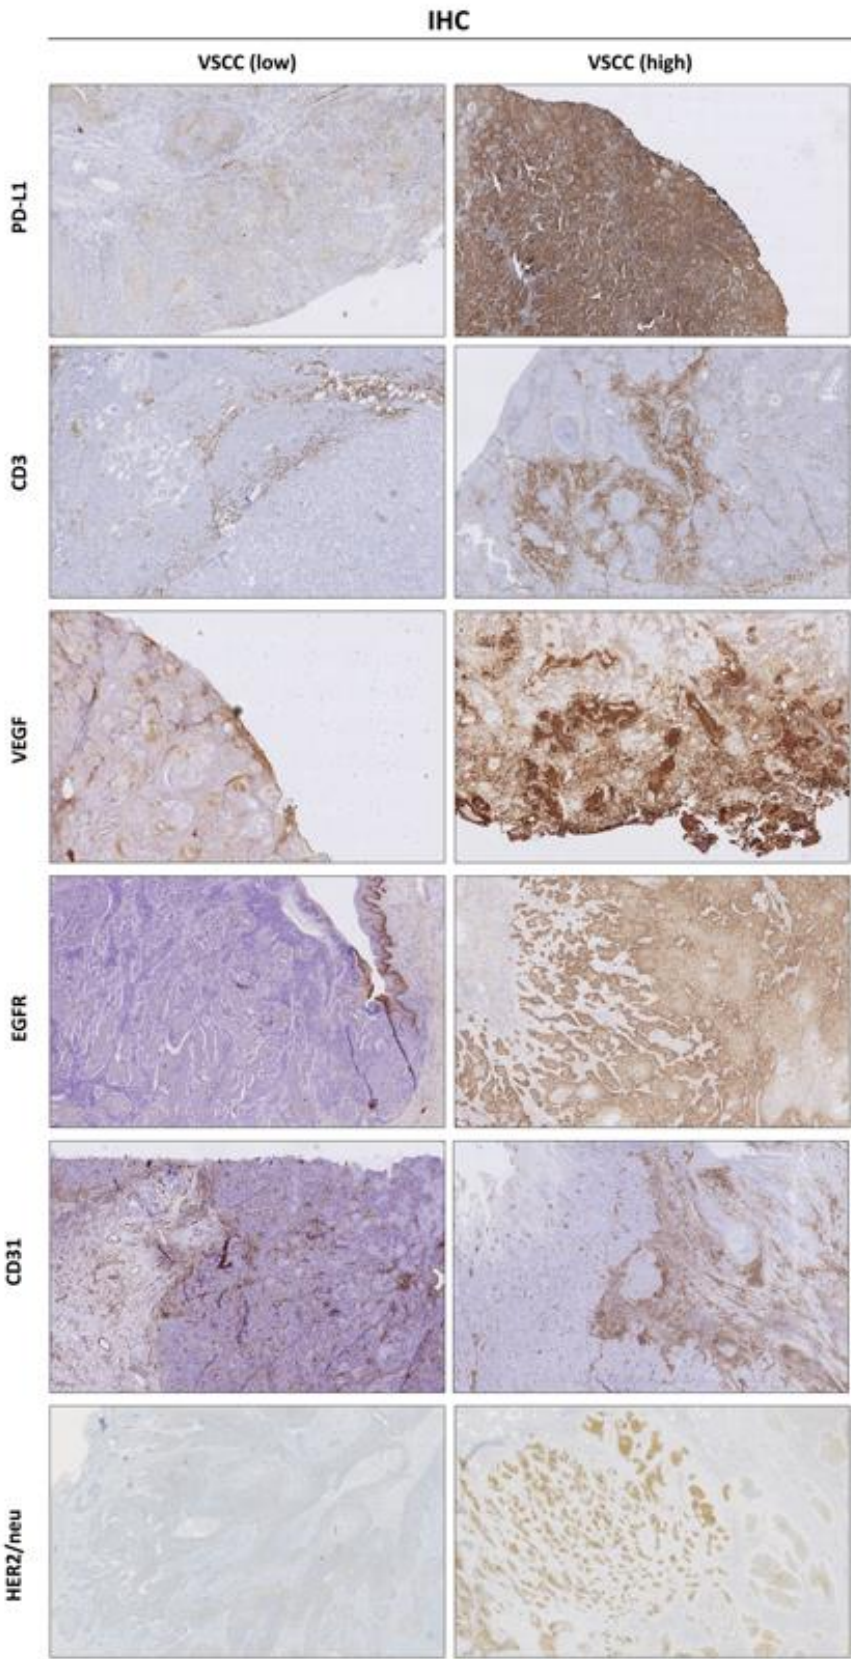

**Figure S1.** Representative examples of low immunohistochemical staining of PD-L1 (60x), CD3 (40x), VEGF (50x), EGFR (60x), CD31 (70x), HER2/neu (100x) (left panel) and high immunohistochemical staining of PD-L1 (60x), CD3 (70x), VEGF (40x), EGFR (70x), CD31 (50x), HER2/neu (60x) (right panel).

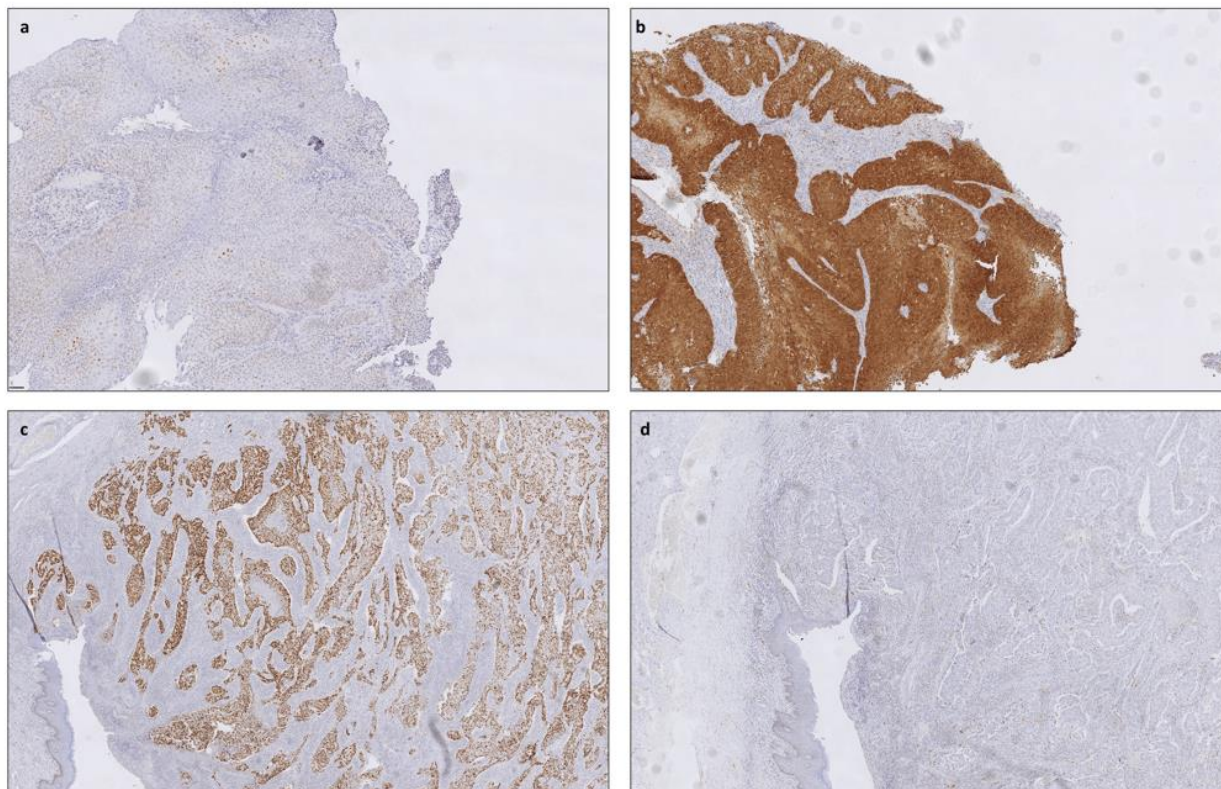

**Figure S2.** Representative examples of immunohistochemical staining of HPV-related (upper panels) and HPV-independent (lower panels) VSCC. (a) p53-wild type (140x), (b) p16 INK4a (score 2) (100x), (c) p53-mutated (50x), (d) p16<sup>INK4a</sup> (score 0) (80x).
